# Supplementary material
Source: HighWire-hosted journal article supplement (https://erj.ersjournals.com/content/55/4/1901934)
Supplement: inline-supplementary-material-1 [file inline-supplementary-material-1.pdf]

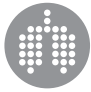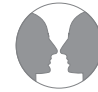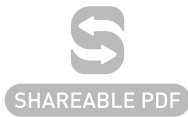

# Chronic thromboembolic disease following pulmonary embolism: time for a fresh look at old clot

Colm McCabe<sup>1,2</sup>, Konstantinos Dimopoulos<sup>1,2</sup>, Alex Pitcher<sup>3</sup>, Elizabeth Orchard<sup>3</sup>, Laura C. Price<sup>1,2</sup>, Aleksander Kempny<sup>1,2</sup> and S. John Wort<sup>1,2</sup>

**Affiliations:** <sup>1</sup>Dept of Pulmonary Hypertension, Royal Brompton Hospital, London, UK. <sup>2</sup>National Heart and Lung Institute, Imperial College, London, UK. <sup>3</sup>Dept of Cardiology, Oxford University Hospital NHS Foundation Trust, Oxford, UK.

**Correspondence:** Colm McCabe, Royal Brompton Hospital, Pulmonary Hypertension Service, Sydney Street, London SW3 6NP, UK. E-mail: c.mccabe2@rbht.nhs.uk

 @ERSpublications

**Chronic thromboembolic disease diagnosed following acute pulmonary embolism warrants refinement of its definition and further evaluation of optimal anticoagulation strategies** <http://bit.ly/38SQXc0>

**Cite this article as:** McCabe C, Dimopoulos K, Pitcher A, *et al.* Chronic thromboembolic disease following pulmonary embolism: time for a fresh look at old clot. *Eur Respir J* 2020; 55: 1901934 [<https://doi.org/10.1183/13993003.01934-2019>].

This single-page version can be shared freely online.

## *To the Editor:*

The recently updated European Society of Cardiology/European Respiratory Society guidelines for acute pulmonary embolism (PE) underline the importance of appropriate long-term management of PE sequelae in the era of extended anticoagulation [1]. Chronic thromboembolic disease (CTED) is one of several conditions contributing to breathlessness in this setting, *i.e.* persistent pulmonary vascular obstruction on imaging, with no evidence of pulmonary hypertension at rest. CTED is increasingly encountered in pulmonary vascular disease clinics following acute PE, and its diagnosis relies heavily on careful exclusion of other conditions that may contribute to symptoms. Given the need for careful follow-up after PE, in this paper we highlight two important points relating to the diagnosis and management of CTED: firstly, the location and extent of chronic pulmonary artery thrombus on imaging and secondly, the lack of evidence to support long-term anticoagulation in CTED, as opposed to chronic thromboembolic pulmonary hypertension (CTEPH).
